## CORRECTIONS

### Decorin suppresses transforming growth factor- $\beta$ -induced expression of plasminogen activator inhibitor-1 in human mesangial cells through a mechanism that involves $\text{Ca}^{2+}$ -dependent phosphorylation of Smad2 at serine-240

N. ABDEL-WAHAB, S. J. WICKS, R. M. MASON and A. CHANTRY

Volume 362 (2002), pp. 643–649

Figure 5 in the above paper was mis-labelled. The correct Figure appears below:

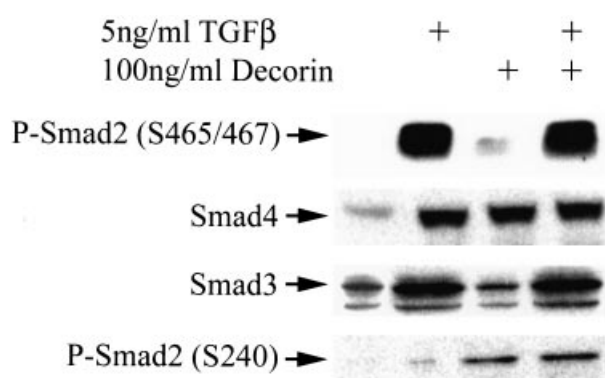

**Figure 5** Nuclear translocation of Ser-240 phospho-Smad2 in mesangial cells

Primary HMCs maintained in 4 mM D-glucose were treated with 5 ng/ml TGF $\beta$ , 100 ng/ml decorin or both, as indicated. After 2 h cells were lysed and nuclear extracts were prepared as detailed in the Experimental section. The proteins were resolved by gradient SDS/PAGE (4–12% gel) and samples probed by Western blotting. Phosphorylation of Smad2 at Ser-465/467 and Ser-240 was monitored using PS2 and PS-240 antibodies, respectively. Similarly, nuclear expression of Smad3 and Smad4 was investigated using specific antisera.

### Diacylglycerol activates the influx of extracellular cations in T-lymphocytes independently of intracellular calcium-store depletion and possibly involving endogenous *TRP6* gene products

A. GAMBERUCCI, E. GIURISATO, P. PIZZO, M. TASSI, R. GIUNTI, D. P. MCINTOSH and A. BENEDETTI

Volume 364 (2002), pp. 245–254

The authors of the above paper wish to acknowledge the prior art of Chakrabarti and Kumar [1].

## REFERENCE

- Chakrabarti, R. and Kumar, S. (2000) Diacylglycerol mediates the T-cell receptor-driven  $\text{Ca}^{2+}$  influx in T cells by a novel mechanism independent of protein kinase C activation. *J. Cell Biochem.* **78**, 222–230
